# Supplementary material for: Heparin-binding motif mutations of human diamine oxidase allow the development of a first-in-class histamine-degrading biopharmaceutical
Source: eLife. 2021 Sep 3;10:e68542. doi: 10.7554/eLife.68542 (PMC8445614; doi:10.7554/eLife.68542)
Supplement: Figure 2—source data 1. [file elife-68542-fig2-data1.docx]

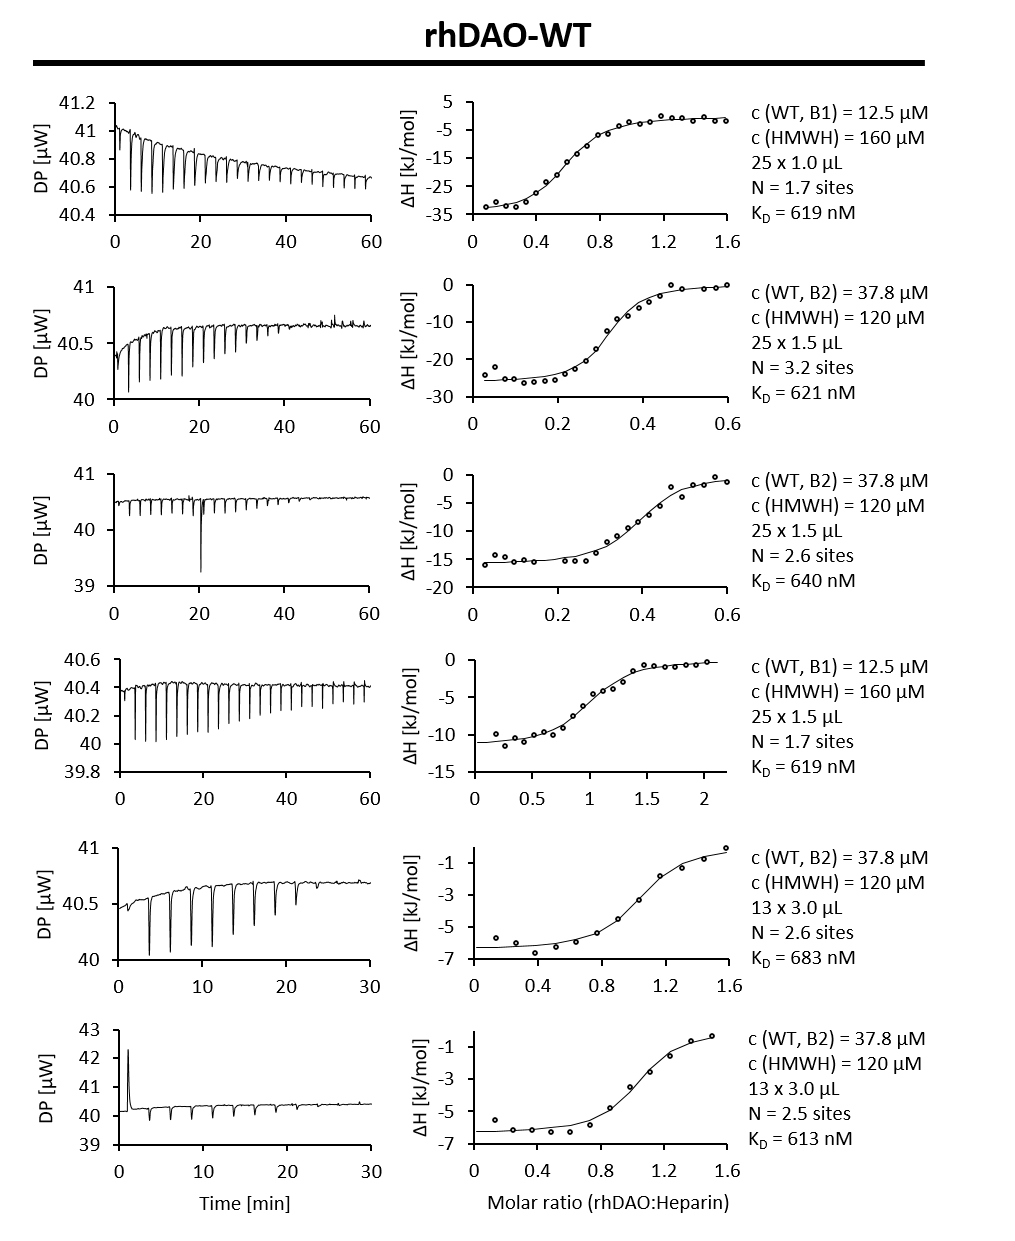


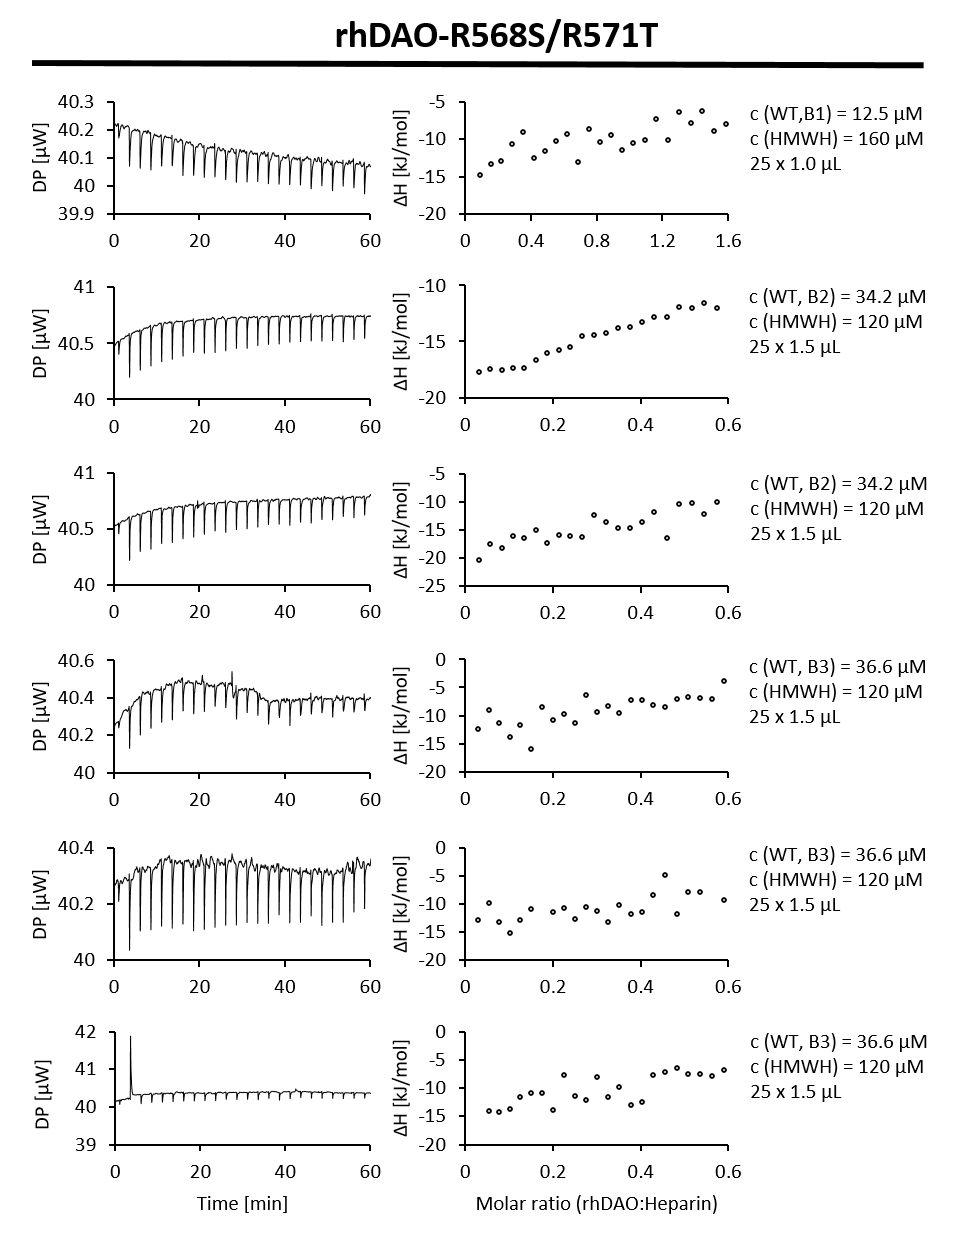


Figure 2 – source data 1. Raw plots and integrated heat plots of isothermal titration calorimetry of rhDAO-WT and rhDAO-R568S/R571T heparin-binding motif mutant with high-molecular weight heparin.

High-molecular weight heparin (HMWH) was titrated into rhDAO-R568S/R571T and rhDAO-WT from individual batches (B1, B2, B3) in 50 mM Hepes buffer with 150 mM KCl, pH 7.5. Protein and ligand concentrations, injection modes, resulting KD values and number of binding sites (N) are shown. The six measurements of rhDAO-WT resulted in a mean (SD) KD value of 633 (26) nM and a stoichiometry of 2.4 (0.6) DAO molecules binding to one HMWH molecule. 1 µM DAO corresponds to 170 µg/mL and 1 µM HMWH corresponds to 15 µg/mL or 3 units/mL. The wildtype data were recently published *(17)*.
